1 **TITLS: The flickering connectivity system of the north Andean páramos**

2 **SHORT RUNNING TITLE: Andean flickering connectivity since 1 Ma**

3

4 **AUTHORS**

5 Suzette G.A. FLANTUA<sup>1,2\*</sup>, Aaron O'DEA<sup>3</sup>, Renske E. ONSTEIN<sup>4</sup>, Henry HOOGHMSTRA<sup>1</sup>

6 <sup>1</sup> Institute for Biodiversity and Ecosystem Dynamics (IBED), University of Amsterdam, Amsterdam, The  
7 Netherlands.

8 <sup>2</sup> Department of Biological Sciences, University of Bergen, Bergen, Norway

9

10 <sup>3</sup> Smithsonian Tropical Research Institute, Box 0843-03092, Balboa, Republic of Panama

11 <sup>4</sup> German Centre for Integrative Biodiversity Research (iDiv), Halle-Jena-Leipzig, Deutscher Platz 5e,  
12 04103 Leipzig, Germany.

13

14 \* Corresponding author: [s.g.a.flantua@gmail.com](mailto:s.g.a.flantua@gmail.com). ORCID: <https://orcid.org/0000-0001-6526-3037>

15

16 **ACKNOWLEDGEMENTS**

17 This work was part of SGAF's doctoral thesis funded by Netherlands Organization for Scientific Research  
18 (NWO, grant 2012/13248/ALW to HH.). The Hugo de Vries foundation is acknowledged for financially  
19 supporting multiple grant proposals during the project including the development of the visualization  
20 accompanying this paper. The Sistema Nacional de Investigadores (SNI) de SENACYT supported AO.  
21 REO acknowledges the support of the German Centre for Integrative Biodiversity Research (iDiv) Halle-  
22 Jena-Leipzig funded by the Deutsche Forschungsgemeinschaft (DFG, German Research Foundation)—  
23 FZT 118. Carina Hoorn and Daniel Kissling are thanked for the educational environment shaped by the  
24 parallel paper on mountain diversity (Antonelli et al., 2018). Colin Hughes is thanked for comments on  
25 previous versions of this paper. We thank Mauricio Bermúdez for help with the geological delimitation of  
26 the Northern Andes and Francisco Cuesta for facilitating the map by Josse et al. (2009).

27 **ABSTRACT AND KEYWORDS**

28 **Aim** To quantify the effect of Pleistocene climate fluctuations on habitat connectivity across páramos in  
29 the Neotropics.

30 **Location** The Northern Andes

31 **Methods** The unique páramos habitat underwent dynamic shifts in elevation in response to changing  
32 climate conditions during the Pleistocene. The lower boundary of the páramos is defined by the upper  
33 forest line, which is known to be highly responsive to temperature. Here we reconstruct the extent and  
34 connectivity of páramos over the last 1 million years (Myr) by reconstructing the UFL from the long fossil  
35 pollen record of Funza09, Colombia, and applying it to spatial mapping on modern topographies across  
36 the Northern Andes for 752 time slices. Data provide an estimate of how often and for how long different  
37 elevations were occupied by páramos and estimates their connectivity to provide insights into the role of  
38 topography in biogeographic patterns of páramos.

39 **Results** Our findings show that connectivity amongst páramos of the Northern Andes was highly  
40 dynamic, both within and across mountain ranges. Connectivity amongst páramos peaked during extreme  
41 glacial periods but intermediate cool stadials and mild interstadials dominated the climate system. These  
42 variable degrees of connectivity through time result in what we term the ‘flickering connectivity system’.  
43 We provide a visualization (video) to showcase this phenomenon. Patterns of connectivity in the Northern  
44 Andes contradict patterns observed in other mountain ranges of differing topographies.

45 **Main conclusions** Pleistocene climate change was the driver of significant elevational and spatial shifts in  
46 páramos causing dynamic changes in habitat connectivity across and within all mountain ranges. Some  
47 generalities emerge, including the fact that connectivity was greatest during the most ephemeral of times.  
48 However, the timing, duration and degree of connectivity varied substantially among mountain ranges  
49 depending on their topographic configuration. The flickering connectivity system of the páramos uncovers  
50 the dynamic settings in which evolutionary radiations shaped the most diverse alpine biome on Earth.

51 **Keywords (6-10):** alpine biome, evolutionary radiations, flickering connectivity system, fossil pollen,  
52 mountain fingerprint, Neotropical biodiversity, páramos, paleotemperature, past habitat connectivity,  
53 species pump

54

## 55 MAIN TEXT

### 56 1. INTRODUCTION

57 Mountains are regarded as powerhouses of biodiversity in the world (Barthlott, Rafiqpoor, Kier, & Kreft,  
58 2005; Kreft & Jetz, 2007; Antonelli et al., 2018) and harbour numerous examples of very rapid and recent  
59 species diversifications ('radiations'; Hughes & Atchison, 2015). It is thought that a large part of this  
60 diversity arose geologically recently, during the Plio-Pleistocene (last 5.3 million years, [Ma]), but there is  
61 no consensus on the drivers of these radiations. One favoured hypothesis is that the combination of high  
62 topographic relief and Plio-Pleistocene climatic oscillations led to rapidly changing distributions of  
63 montane species, which generated new lineages (e.g. Qian & Ricklefs, 2000; Graham et al., 2014; Mutke,  
64 Jacobs, Meyers, Henning, & Weigend, 2014). However, the relative contributions of isolation (e.g.  
65 Schönswetter, Stehlik, Holderegger, & Tribsch, 2005; Wallis, Waters, Upton, & Craw, 2016; Weir,  
66 Haddrath, Robertson, Colbourne, & Baker, 2016) vs. gene flow and dispersal (e.g. Smith et al., 2014;  
67 Cadena, Pedraza, & Brumfield, 2016; Kolář, Dušková, & Sklenář, 2016; Knowles & Massatti, 2017) in  
68 driving fast diversification rates (i.e. the 'species-pump' effect, Rull, 2005; Rull & Nogué, 2007;  
69 Winkworth, Wagstaff, Glenny, & Lockhart, 2005; Ramírez-Barahona & Eguiarte, 2013; Steinbauer et al.,  
70 2016; Flantua & Hooghiemstra, 2018) are still debated. It is likely that these radiations have been the  
71 results of the interchange between phases of isolation, causing allopatric, *in situ* speciation, and  
72 connectivity, triggering diversification through dispersal and settlement in new areas and hybridization of  
73 differentiated taxa from previously isolated populations (Flantua & Hooghiemstra, 2018). The fastest and  
74 most spectacular radiations may therefore occur in mountain regions with variable degrees of past  
75 connectivity and isolation during climate fluctuations, which, complex in space and time, are inherently  
76 related to the mountain topography (Flantua & Hooghiemstra, 2018). It is therefore critical to quantify  
77 connectivity of montane habitats using our understanding of topography and past climate fluctuations  
78 **(Fig. 1)**.

79 The Northern Andes is an ideal model system to quantify connectivity, due to the large variation in  
80 topography and the advanced paleoecological knowledge on Plio-Pleistocene climate fluctuations derived  
81 during the last five decades (Hooghiemstra & Flantua, 2019). The Northern Andes is topographically-rich  
82 with high elevations, steep ridges and valleys (see illustrations by Von Humboldt during his trips in Latin  
83 America, 1773-1858), composed of several mountain ranges, some of which are parallel running from  
84 North to South. The area hosts the treeless tundra-like alpine biome, the páramos, regarded the richest  
85 alpine flora in the world in terms of endemism and species richness (Sklenář, Hedberg, & Cleef, 2014)  
86 and is known for its bursts of Plio-Pleistocene species diversification amongst plants (see overview in

87 Hughes & Atchison, 2015). In terms of quantifying Plio-Pleistocene temperature fluctuations, the  
88 palaeoecological history of the páramos has been studied extensively (e.g. Van der Hammen, 1974; Cleef,  
89 1979; Hooghiemstra, 1984; Hooghiemstra & Van der Hammen, 2004) because of the unique high  
90 elevation fossil pollen records that cover most of the Pleistocene (Groot et al., 2011; Groot, Hooghiemstra,  
91 Berrio, & Giraldo, 2013; Bogotá-Angel et al., 2011; Bogotá-A., Hooghiemstra, & Berrio, 2016; Torres,  
92 Hooghiemstra, Lourens, & Tzedakis, 2013). Under current conditions, the páramos form isolated  
93 archipelagos of alpine (sky) islands (McCormack, Huang, & Knowles, 2009) but the rich collection of  
94 fossil pollen sequences throughout this region (Flantua et al., 2015) show that the páramos underwent  
95 substantial elevational shifts during the Pleistocene, resulting in extensive changes in surface area and  
96 connectivity (Van der Hammen, 1974; Hooghiemstra & Van der Hammen, 2004; Flantua et al., 2014;  
97 Sklenář et al., 2014). Thus, the topographic diversity and the robust catalogue of palaeoecological  
98 reconstructions make the Northern Andes a highly suitable model region to explore patterns of  
99 connectivity in mountain biomes in response to Pleistocene climate fluctuations.

100 In this study, we aim to quantify the biogeographic changes of the páramos in terms of spatial scale and  
101 connectivity based on modern topography and pollen-based records of past climate change. Specifically,  
102 we developed a novel tool to explore the complex temporal and spatial patterns of páramo connectivity.  
103 We constrain our model by using the last 1 Myr of the high-resolution fossil pollen record of Funza09, a  
104 586 m deep core taken from the Bogotá basin of Colombia (Torres et al., 2013). Available surface area  
105 (Elsen & Tingley, 2015) and connectivity (Flantua et al., 2014; Bertuzzo et al., 2016) is variable along  
106 elevational gradients of mountains. We therefore hypothesize that the different mountain ranges that  
107 compose the Northern Andes display variable patterns of past páramo connectivity dependent upon their  
108 topography (**Fig. 1**). We discuss the implications of our outcomes for evolutionary processes and how  
109 defining and quantifying past connectivity in mountain systems is essential to help reveal mechanisms of  
110 ecological, biogeographical and evolutionary change. Ultimately, our quantification of páramo  
111 connectivity through space and time provides a unique opportunity to disentangle some of the mechanistic  
112 drivers ('modulators') of radiations in this biome (Bouchenak-Khelladi, Onstein, Xing, Schwery, &  
113 Linder, 2015).

114

## 115 **2. METHODS**

### 116 **2.1 Geographical features**

117 The Northern Andes (ca. 448.000 km<sup>2</sup>) covers parts of Venezuela, Colombia and Ecuador (**Fig. 2a**), and

118 can be partitioned into six principal mountain ranges or 'cordilleras' (**Fig. 2c**), namely the Sierra Nevada  
119 de Santa Marta (SNSM), Cordillera de Mérida, Eastern, Central and Western Cordillera and the  
120 Ecuadorian Cordilleras. Most of the Northern Andes is considered a highly to extremely high rugged  
121 landscape (**Fig. 2b**; See mountain illustrations by Von Humboldt (1845) where the high peaks and deep  
122 inter-Andean valleys cause strong contrasts in climate throughout the region (Flantua et al., 2016). Surface  
123 area in mountains does not decrease monotonically with elevation as has been shown previously in  
124 southern Colombia by Flantua et al. (2014) and on a global scale by Elsen & Tingley (2015). The  
125 Northern Andes shows a decrease of surface area going upslope where there is a slight peak around 900-  
126 1200 m asl but then continues to decrease up to 6260 m asl (**Fig. 2d**), following a typical 'pyramid shape'.  
127 However, the different cordilleras show different patterns of elevational surface area (**Fig. 2d**) where the  
128 Eastern Cordillera shows a sharp peak around 2600 m asl and the Ecuadorian Cordillera shows high  
129 values of surface area at much higher elevations than the other cordilleras (**for more details see Table**  
130 **S1.1, Appendix S1 in Supporting Information**). Of all tropical alpine floras, such as in East Africa and  
131 New Guinea, the páramos are home to the highest species richness and endemism (Luteyn, 1999; Sklenář,  
132 Dušková, & Balslev, 2011), with low between-mountain similarity in species; (Sklenář et al., 2014). The  
133 páramos today are spread out over the Northern Andes as an archipelago of small and highly fragmented  
134 páramo complexes (**Figure S2.1, Appendix S2**).

135

## 136 **2.2 Quantifying temperature and upper forest line based on fossil pollen data**

137 To quantify temperature fluctuations during the Pleistocene (and consequently estimate páramo  
138 connectivity), we used fossil pollen data from the Northern Andes. The composite pollen record Funza09  
139 (4.83°N, 75.2°W; 2550 m asl, **Fig. S2.1. Red star**) reveals vegetation and climate dynamics over the past  
140 2.25 Myr (Torres et al., 2013). We reconstructed the páramos' elevational fluctuations, and consequently  
141 páramo connectivity, by estimating the upper forest line (the transition from the upper montane forest to  
142 the páramos; UFL) from the Funza09 record. Though this record covers the last 2.2 Myr, we only used the  
143 last 1 Myr as this interval reflects continuous lake conditions in comparison with variable hydrological  
144 conditions between 2.2-1 Ma which obscure the quantification of changes to the UFL. We follow the  
145 methodology described and implemented by Hooghiemstra (1984), Groot et al. (2011), and Hooghiemstra  
146 et al. (2012) to derive the Andean UFL and paleotemperature curve (for detailed methodology on the UFL  
147 reconstruction see **Appendix S3**)

148

### 149 **2.3 Calculations of connectivity per páramo “island”**

150 To calculate the degree of connectivity between páramos, we used a graph-based habitat availability index  
151 called probability of connectivity (PC) metric. This metric takes into account the area of the páramo  
152 "island" itself and the distances to other islands where a user-defined distance threshold defines the  
153 ‘reachability’ of other islands (Saura & Pascual-Hortal, 2007; Saura, Estreguil, Mouton, & Rodríguez-  
154 Freire, 2011), even if they are not physically connected (i.e. ‘structural connectivity’, Tischendorf &  
155 Fahrig, 2000). The metric assigns a value to each páramo island representing its contribution in  
156 maintaining the overall connectivity of the páramo biome (Saura & Pascual-Hortal, 2007; Saura et al.,  
157 2011). The total PC is built up in three ‘fractions’, namely the ‘intrapatch’, the ‘flux’, and the ‘connector’  
158 fractions (Saura & Rubio, 2010). The first fraction focusses on the available surface area and habitat  
159 quality (if applicable) within the individual island. The second fraction assesses how well the individual  
160 island is connected to other islands given additional importance to the other islands’ attributes (surface and  
161 quality) and its strategic position to other páramo islands. The third fraction quantifies the contribution of  
162 the island to maintain connectivity between the rest of the islands, in other words its role as an  
163 intermediate stepping stone between non-adjacent islands. Additionally, we calculated the equivalent  
164 connected area (ECA), which is derived directly from the PC, as a measure of the overall connectivity of a  
165 region (Saura et al., 2011). Conefor Sensinode 2.2 software and ESRI ArcGIS 10.3 were used to calculate  
166 the straight-line distances between islands, the PC and ECA (Saura & Pascual-Hortal, 2007; Saura &  
167 Torné, 2009). We calculated connectivity for the entire Northern Andes and for each mountain range  
168 separately.

169

### 170 **2.4 Calculations of corridors between páramo islands**

171 We identified corridors between páramo islands within and between cordilleras under different climatic  
172 conditions. We used the Gnarly Landscape Utilities (V0.1.3; McRae, Shirk, & Platt, 2013) with ESRI  
173 ArcGIS 10.3 to create a raster grid of 'landscape resistance' based on ruggedness (**Fig. 2b**) and habitat  
174 suitability. We assumed an increased landscape resistance with increased ruggedness, assigning values  
175 between 0 (no resistance) to 100 (maximum resistance) using an equal interval classification. For the  
176 habitat suitability map, we started by assigning a “perfectly suitable” score of 100 to each páramo island,  
177 while outside the island the score of 0 reflects maximum unsuitability. To soften this boundary, an  
178 exponential decay function was then used by increasing resistance in 5 elevational steps of 100 m where  
179 we assigned a suitability score of 40 to the boundary of the páramo. As a result of the decay function the  
180 highest suitability of páramo - its core area - was restrained 200 m above the UFL and 200 m below the

181 snowline.

182 We used Linkage mapper to calculate the least-cost pathways, or corridors, based on the produced raster  
183 grid of landscape resistance (McRae & Kavanagh, 2011). These corridors are expressed as ‘conductance  
184 maps’ that represent gradients of cumulative corridors. Where the densities of corridors is highest, it is  
185 assumed that there is a high probability of dispersal and migration possible between islands (McRae,  
186 Dickson, Keitt, & Shah, 2008). The full landscape of the Northern Andes is considered an area where  
187 corridors could exist, with exception of the region between SNSM and the Sierra de Perijá (**Fig. S2.1**).

188 We resampled the 30 m Digital Elevation Model (DEM, **Fig. 2**) to a 1 km resolution to reduce computing  
189 time for each Linkage mapper down to on average 2 hours. We allowed Linkage mapper to create  
190 corridors through (instead of only between) core areas to represent the full arsenal of connectivity through  
191 the landscape. Only corridors between páramo islands larger than 1 km<sup>2</sup> were considered at any given  
192 moment in time. From the final output maps, only values lower than 200k conductance (default threshold)  
193 are selected to highlight the strongest corridors. The outputs were weighted according to the percentage of  
194 time they occurred during the last 1 Myr.

195

## 196 **3. RESULTS**

### 197 **3.1 A million years of temperature fluctuations**

198 Temperatures at Funza (2550 masl) are estimated to have fluctuated between ca. 15 and 6°C causing an  
199 estimated maximum 1600 m elevational shift of the UFL between ca. 3500 and ca. 1900 m asl (**Fig. 3**).  
200 The Pleistocene glacial-interglacial dynamics were not replicated cycles of temperature change showing  
201 repeated patterns of high and lows, but display a high temporal variability between each glacial-  
202 interglacial cycle. Conditions similar to the current warm, interglacial conditions occurred several times  
203 during the last 1 Myr and accounted for around a quarter of the time. Extreme cool glacial conditions, ~ 6  
204 - 8°C cooler than today, were relatively rare, occurring less than 10 percent of the time. On the whole,  
205 intermediate cool stadials and mild interstadials dominated the last 1 Myr, occurring over two thirds of the  
206 time.

207

208

209

### 210 **3.2 Calculations of páramo connectivity**

211 Our estimations on the spatial and elevational extent of ancient páramos and their connectedness at  
212 different times in the past reveals that páramos underwent frequent spatial alterations between fragmented  
213 and connected spatial configurations, but the exact patterns were highly dependent on mountain chain  
214 topography (**Fig. 4a,b. See Appendices 4 and 5**). The páramos in the Ecuadorian Cordillera generally  
215 maintained a high degree of connectivity over the last 1 Myr, rarely enduring severe fragmentation.  
216 Fragmentation did however occur when the snowline plunged significantly during colder and wetter  
217 glacial periods, causing a break up of páramo areas on lateral flanks of the mountains. Likewise, the level  
218 of connectivity between páramos on the Central Cordillera fragmented substantially through a descending  
219 snowline, breaking the upper elevation limit of páramo connectivity. In contrast, the Eastern Cordillera  
220 shifted substantially between periods of connectivity and fragmentation, always, however, maintaining  
221 two large páramo islands surrounded by smaller ‘satellite islands’. Páramos in the Cordillera de Mérida  
222 seem to have been restricted during interglacials to one core area only, while during colder periods a  
223 relatively high fragmentation is observed possibly due to glaciers pushing páramos to lateral distributions.  
224 Here connectivity increased mainly towards the southwest and during colder periods ( $UFL \leq 2300$  m asl).  
225 The páramos of the SNSM and the Western Cordillera endured the highest degree of rates of change in  
226 fragmentation of all ranges. In the latter, páramo habitats are estimated to have often completely  
227 disappeared. In contrast, páramos of the Central Cordillera maintained a long latitudinal distribution,  
228 forming a chain of isolated populations in small patches that on the whole remained connected. Even in  
229 very cold conditions, no continuous connectivity of core areas seems to have been possible between the  
230 Eastern Cordillera and Cordillera de Mérida, or the region of Sierra de Perijá. Towards the south of the  
231 Eastern Cordillera a low-elevation barrier was possibly crossed at 1900 m asl forming a brief bridge  
232 suitable for páramo habitat into the Macizo Colombiano of the Central Cordillera.

233 The reconstruction of putative corridors shows a complex spatial pattern through the mountainous  
234 landscapes of the Northern Andes (**Fig. 4c,d**). The long ridge of the Central Cordillera forms the starting  
235 point of numerous corridors to the páramos in the Western Cordillera. The Eastern Cordillera shows a  
236 complex internal pattern of corridors, where there are neither strong corridors towards Sierra de Perijá in  
237 the North, nor towards the Cordillera de Mérida, while a high concentration of corridors is found between  
238 the large páramos complexes in the Eastern Cordillera (Páramos of Boyacá and Cundinamarca, **Fig. 1**). In  
239 the Ecuadorian Cordillera a more lateral pattern of high/low potential corridors is observed following the  
240 intra-Andean valleys and peaks within this mountain range. Corridors to the southernmost páramos of  
241 Ecuador as also the northernmost páramos of the Western Cordillera are weak and occurred infrequent  
242 during the last million years, shown by the thin lines.



### 243 **3.3 Flickering connectivity systems**

244 Páramo connectivity through time shows a highly variable pattern (**Fig. 5.a**) introduced by Flantua &  
245 Hooghiemstra (2018) as a flickering connectivity system (see **visualization in Appendix S6**). We find  
246 support for the hypothesis that this system with fluctuating, highly variable connectivity in spatial and  
247 temporal dimension is unique for each mountain range of the Northern Andes (**Fig. 1**). For example,  
248 changes in connectivity within the Ecuador Cordillera are substantial but the system ‘flickers’ around a  
249 high average when compared to other mountain ranges. The flickering connectivity systems within the  
250 Eastern and Central Cordillera are surprisingly similar, though the peaks of connectivity during glacial  
251 periods and the dips of connectivity during interglacials are more extreme in the former (**Fig. 5a**). The  
252 Western Cordillera is a larger mountain range than the Cordillera of Mérida and the SNSM (**Table S.1**),  
253 and its variation of connectivity has been correspondingly larger (**Fig. 5b**) but with the lowest occurrence  
254 of connectivity compared to the other mountain ranges (**Fig. 5a**). Considering only the frequency in the  
255 distribution of data (**Fig. 5b**), the Ecuadorian Cordillera and the SNSM stand out for their relatively small  
256 within-mountain range variation in connectivity, compared to the Eastern and Central Cordillera (similar  
257 patterns) and the Western Cordillera.

258 When frequencies of connectivity are weighted by the amount of time that connectivity lasted two main  
259 patterns emerge (**Fig. 5c**). The first is shared by the Western, Central, and Eastern Cordilleras, which all  
260 display an elongated pattern where the highest values are around a centroid, resembling a ‘humming top’  
261 or, as Elsen & Tingley (2015) recognized in mountain hypsographies, a ‘diamond’ shape. Ecuadorian  
262 Cordilleras, Cordillera de Mérida and SNSM instead reveal a different pattern with a narrower centroid  
263 that widens towards the upper and lower section, resembling an ‘hourglass’ shape. Here, the Ecuadorian  
264 Cordillera and SNSM show a surprising similarity though at different connectivity ranges. The Central  
265 and Eastern Cordilleras are strikingly similar overall.

266

## 267 **4. DISCUSSION**

### 268 **4.1 Variable degrees of past connectivity of different mountain ranges**

269 Although currently isolated, evolutionary radiations and the assembly of the páramo ecosystem formed  
270 during times when the páramos were flickering in and out of connectivity (**Fig. 5b**.) The concept of  
271 ‘mountain fingerprints’ (Flantua & Hooghiemstra 2018) proposes that the region’s complex topography  
272 would have meant that páramos in different mountain regions would have fragmented and connected at

273 different periods of time and with different rates and frequencies (as summarized in **Fig. 1**). This means  
274 that in some mountain ranges the páramos are a mix of somewhat even occurrence of connectivity and  
275 fragmentation events through time (**Fig.1b**, here representative of the Eastern Cordillera), or could have  
276 been dominantly fragmented (**Fig.1a**, e.g. Western Cordillera), or more connected (**Fig. 1c**, e.g.  
277 Ecuadorian Cordilleras). These regional differences in the temporal and spatial variation in past páramo  
278 connectivity (**Figs 4 and 6**) are likely to have resulted not only in regional differences in biogeographical  
279 patterns through time, but also varying ecological and evolutionary processes. We therefore propose that  
280 the data we present can be used to test hypotheses of the drivers of species richness, endemism and  
281 degrees of Pleistocene diversification in the Northern Andes, and likewise are applicable to other  
282 mountain regions around the world.

283

#### 284 **4.2 Evolutionary implications of the flickering connectivity system**

285 The dynamic history of the páramos elucidated by the flickering connectivity system can provide three  
286 important insights in terms of evolutionary processes. First of all, the regional differences in past páramo  
287 connectivity - the mountain fingerprint – support temporally and spatially discordant phylogeographic  
288 patterns (Pennington et al., 2010; Massatti & Knowles, 2014; Papadopoulou & Knowles, 2015; 2016).  
289 This means that the timing of diversification in the different mountain regions would not be expected to  
290 have occurred synchronously, even if all phylogenetic studies on páramo species could overcome current  
291 issues in techniques, spatial resolution and time-calibration points (Rull, 2011). Secondly, diversification  
292 rates might differ along the elevational gradient and this might be the rule rather than the exception.  
293 Elevational differences in surface availability and connectivity are likely to influence at what elevation the  
294 strongest phylogeographic processes will occur, and these processes are thus expected to differ between  
295 mountain systems resulting in elevational differences of diversification (see for instance Kropf, Kadereit,  
296 & Comes, 2003; Lagomarsino, Condamine, Antonelli, Mulch, & Davis, 2016). And thirdly, the flickering  
297 connectivity system, which is expected to cause isolation followed by connectivity of populations, is  
298 expected to cause pulses of diversification (Knowles, 2000), possibly resulting in series of sub-radiations  
299 in the páramos. Where isolation resulted in allopatric, *in situ* speciation, connectivity triggered  
300 diversification through dispersal and settlement in new areas (“dispersification”, Moore & Donoghue,  
301 2007), and hybridization of differentiated taxa from previously isolated populations (Petit et al., 2003;  
302 Grant, 2014). Phylogenetic studies are increasingly supportive of the important role of gene flow,  
303 dispersification and hybridization, alongside periods of isolation, in driving (explosive) diversification in  
304 mountains (e.g. Knowles & Massatti, 2017; Hazzi, Moreno, Ortiz-Movliav, & Palacio, 2018), as well as in

305 other systems such as tropical rainforests (e.g. Onstein et al., 2017) and islands (e.g. Ali & Aitchison  
306 (2014). In the páramos, examples originate from studies on birds (Quintero & Jetz, 2018; Cadena et al.,  
307 2016) and plants, such as *Neobartsia* (Uribe-Convers & Tank, 2015), *Lupinus* (Hughes & Eastwood,  
308 2006; Nevado, Contreras-Ortiz, Hughes, & Filatov, 2018; Contreras-Ortiz, Aitchison, Hughes, &  
309 Madriñán, 2018), *Loricaria* (Kolář et al., 2016), *Espeletia* (Diazgranados, 2012; Diazgranados & Barber,  
310 2017; Pouchon et al., 2018) and *Hypericum* (Nürk, Scheriau, & Madriñán, 2013), supporting the strong  
311 relationship between changing degrees of connectivity and radiations (Flantua & Hooghiemstra, 2018).  
312 Interestingly, the Funza09 pollen record shows a clear shift in the rhythm of climate change around the  
313 mid-Pleistocene transition (ca. 0.9 Ma) after which 100 kyr cycles with high amplitudes started to  
314 dominate the climate, overruling the lower-amplitude 41-kyr cycles that continued in the background.  
315 Strikingly, changes in speciation rates of high elevation birds (Weir, 2006) and the Espeletiinae in the  
316 Cordillera de Mérida (Pouchon et al., 2018), echo the mid-Pleistocene transition by an acceleration of  
317 diversification during the last 1 Myr suggesting a close link between the intensity of the flickering  
318 connectivity system and radiations.

319

#### 320 **4.3 Limitations and model assumptions**

321 Inherent to any model in mountains and concerning connectivity are simplifications of the temporal and  
322 spatial complexity of the real world. For instance, the UFL is asymmetric on wet and dry mountain slopes  
323 (e.g. Cleef, 1981), the current elevation of the UFL shows a range of variation of ca. 200 m (incidentally  
324 to 300 m), surface processes have changed topography on a million years time scale (Herman et al., 2013;  
325 Antonelli et al., 2018), the elevational temperature gradient (lapse rate) seems higher during glacial  
326 conditions than at present (Wille, Hooghiemstra, Behling, van der Borg, & Negret, 2001; Loomis et al.,  
327 2017), and the current subdivision of páramo vegetation into a 300 m : 600 m : 200 m interval for  
328 shrubpáramo, grasspáramo, and superpáramo, respectively, is subject to change (Van der Hammen, 1981;  
329 Hooghiemstra, 1984), potentially related to changing atmospheric pCO<sub>2</sub> levels (Boom, Mora, Cleef, &  
330 Hooghiemstra, 2001; Boom, Marchant, Hooghiemstra, & Sinninghe Damsté, 2002). We estimate the  
331 potential impact of these factors on the estimated connectivity of little significance in determining the  
332 overall patterns observed in the flickering connectivity systems.

333 Any study concerning connectivity also uses a number of assumptions on the probability of dispersal  
334 through the landscape. Here, we used a generalized PC value of 0.5 at 10 km to estimate the degree of  
335 connectivity. However, species traits, life histories and dispersal capacities may strongly influence  
336 dispersal distances (Onstein et al., 2017), and thus influence the probability of connectivity between

337 populations. Implementing taxon-specific traits when calculating the landscape resistance grid (see  
338 Methodology) may thus improve the accuracy of the connectivity estimates. Also, family or taxa specific  
339 connectivity maps could uncover why certain plant genera do not show any evolutionary diversification  
340 during the Pleistocene, e.g. *Distichia* (Juncaceae; Colin Hughes, personal comm.) and *Arcytophyllum*  
341 (Rubiaceae; Madriñán, Cortés, & Richardson, 2013). Additionally, *a priori* "hard" barriers can be imposed  
342 to emphasize areas where habitat connectivity is unlikely to have occurred (see for instance how we  
343 maintained SNSM isolated from the other mountain ranges). Defining these barriers *a priori* is not  
344 indispensable, though, as the connectivity analysis hints at strong dispersal restrictions when resistance  
345 values of corridors are high and indicative of highly constrained dispersal. In the Northern Andes, this is  
346 shown by the multiple single line corridors between the Central and Eastern Cordillera, confirmed by the  
347 lack of gene flow between plant populations of these regions (Jabaily & Sytsma, 2013; Diazgranados &  
348 Barber, 2017; Contreras-Ortiz et al., 2018). This example illustrates the added value of integrating  
349 different lines of evidence (e.g. genetic, fossil, paleoclimate) in a spatial and temporal context to  
350 understand the biogeographical patterns observed in phylogeographic studies.

351

#### 352 **4.4 Future research**

353 Our spatio-temporal estimates of past connectivity lay a foundation for further research on elucidating the  
354 causal mechanisms of mountain diversifications. Models of past connectivity (**Figs. 4 and 5**), when  
355 combined with phylogeographic data, could help reveal the role of interspecific gene flow and allopatric  
356 speciation in driving radiations in the high Andes (Nevado et al., 2018) and contribute to a better  
357 understanding of the relative importance of geography vs adaptive radiation that underpin Andean  
358 diversifications (Contreras-Ortiz et al., 2018). In such a complex system it may also be useful to pay  
359 attention to commonalities. For example, when considering both frequency and duration, our data show  
360 that two connectivity patterns emerge (i.e. hourglass vs. non hourglass; **Fig.5.c**). Research could explore if  
361 cordilleras with shared connectivity patterns also share phylogenetic histories and contemporary  
362 (endemic) species' biogeographies to test for universal mechanisms that have shaped present day alpine  
363 biomes. This would be especially useful if used in conjunction with information on the reproductive life  
364 histories, growth and dispersal capacities of specific taxa.

365 Finally, past patterns of connectivity are critical to interpret biogeographical patterns of currently isolated  
366 or fragmented systems in a wide variety of terrestrial ecosystems including mountains (Flantua &  
367 Hooghiemstra, 2018), islands (e.g. Simpson, 1974; Weigelt, Steinbauer, Cabral, & Kreft, 2016; Norder et  
368 al., 2018), fresh water systems (e.g. Dias et al., 2014), rainforests (e.g. Graham, Moritz, & Williams,

369 2006), and grasslands (e.g. Lindborg & Eriksson, 2004; Münzbergová et al., 2013), and marine coastal  
370 ecosystems (Hoeksema, 2007) that similarly experienced major spatial changes during rapid sea-level  
371 fluctuations over the Pleistocene. The approach developed here, to quantify historical connectivity, can  
372 therefore provide a platform for interpreting contemporary biogeographies and past drivers of  
373 diversification in a wide array of both marine and terrestrial ecosystems where available space has been  
374 altered by climatic fluctuations. We postulate that quantifying flickering connectivity systems will  
375 facilitate a much more detailed and much needed quantitative basis to compare diversity patterns across  
376 the mountain regions of the world.

377

## 378 **5. CONCLUSIONS**

379 We present a pollen-based biogeographical model for the páramos biome spanning the northern Andes  
380 (Venezuela, Colombia and Ecuador) over the last 1 Myr. Our models suggest substantial temperature  
381 oscillations where extreme temperature lows were ca. 8°C cooler than today, causing a lowering of the  
382 UFL of ca. 1600 vertical meters. These extreme cool events were however rare and during glacial periods  
383 most of the time cool stadials and interstadials prevailed. Our analysis shows that páramos on all mountain  
384 ranges underwent frequent alterations between fragmented and connected configurations, but the  
385 estimated degrees and amount of connectivity varied among mountain ranges. Most páramos expanded  
386 during glacial periods even though extensive glaciers were present. To a large extent the current páramo  
387 distribution was replaced by glaciers, implicating a substantial range size change of populations and a  
388 highly dynamic system during Pleistocene times.

389 In light of Von Humboldt's work of relevance of different topographies for mountain biota, we show that  
390 topography and climate change together dictated páramo connectivity through time with high spatial  
391 variability. The interplay of the topographic and paleoclimatic conditions created a unique pattern of  
392 connecting and fragmenting páramo patches through time, here described as the flickering connectivity  
393 system. Our spatially explicit model quantifies the complexity of mountain biome dynamics during  
394 climate oscillations, in terms of the degree, frequency and duration of past connectivity of alpine biome  
395 mountains (**Figs 4 and 5**) and can be applied to other mountain regions. Our connectivity estimates can  
396 contribute to answering long-standing questions on the drivers of evolutionary diversification in  
397 phylogenetic and phylogeographic studies, and enrich our understanding of the biogeographic history of  
398 mountain ecosystems more generally.

399

400 *“There the different climates are ranged the one above the other, stage by stage, like the vegetable zones,*  
401 *whose succession they limit; and there the observer may readily trace the laws that regulate the*  
402 *diminution of heat, as they stand indelibly inscribed on the rocky walls and abrupt declivities of the*  
403 *Cordilleras”* (Von Humboldt, 1877 (1845), I, p 46).

404

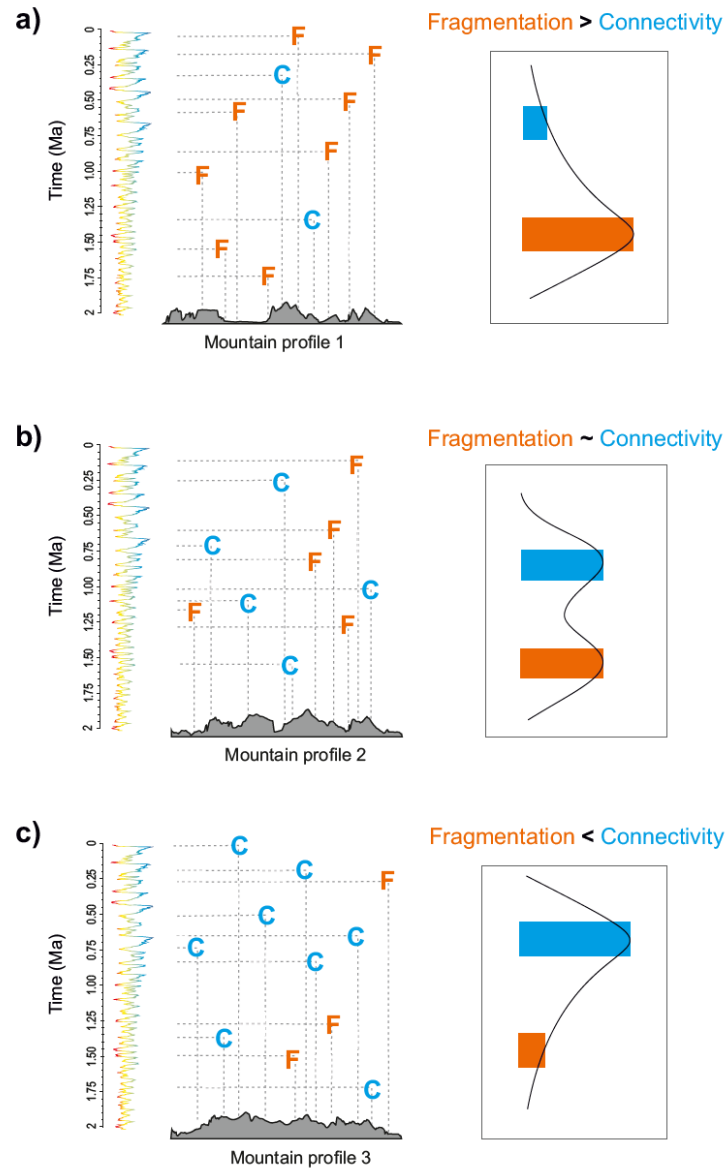

405

406 **Figure 1 | Connectivity and fragmentation in a mountain landscape.** Connectivity (blue) and fragmentation  
407 (orange) events occurred in a spatially and temporally variable manner. This complex pattern in space (latitude,  
408 longitude, elevation) and time resembles a multi-dimensional “mountain fingerprint” which is unique for each  
409 mountain range (Flantua & Hooghiemstra, 2018). Three hypothetical mountain profiles are shown with elevational  
410 shifts in vegetation distribution driven by climate change (pollen-based record at the left indicating temperature). We  
411 recognise mountains with where a) only few events of connectivity occurred during the Pleistocene compared to  
412 fragmentation events (‘fragmentation-prone mountain fingerprint’), connectivity events interchanged with isolation  
413 events in an evenly manner (‘mixed connectivity-fragmentation mountain fingerprint’), c) connectivity is facilitated  
414 and occurred more often than fragmentation events (‘connectivity-prone mountain fingerprint’). The right panel is  
415 only based on frequency, not the duration of each event.

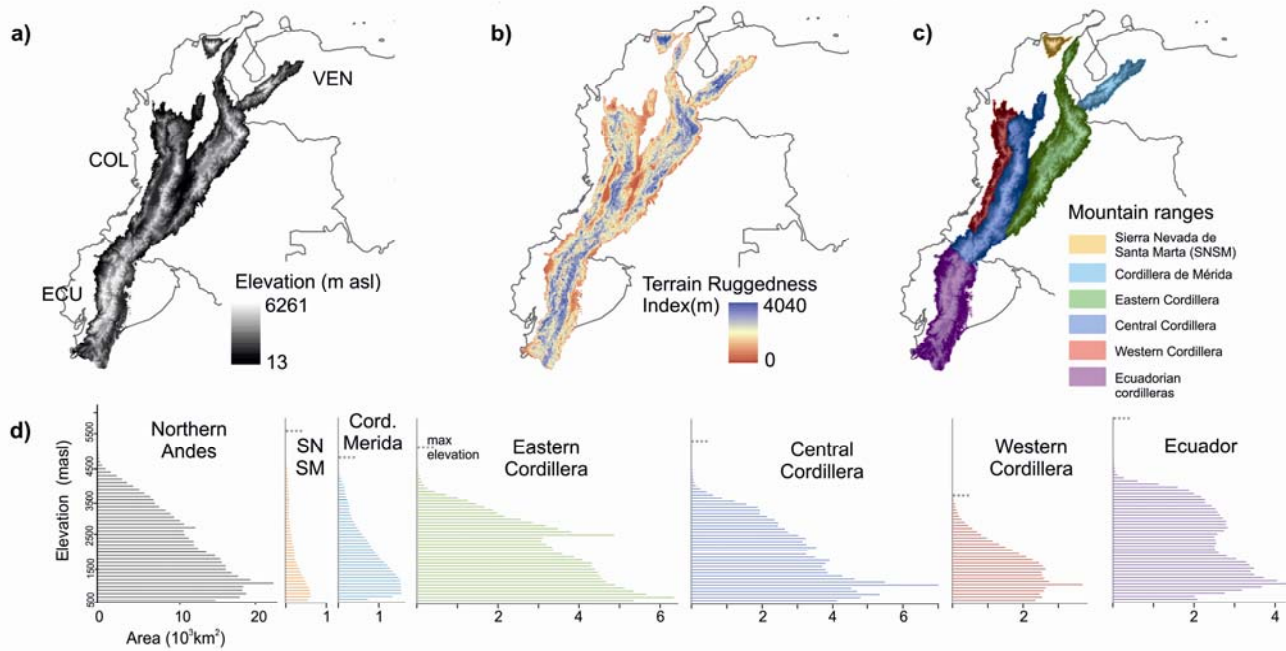

416

417 **Figure 2 | Hypsographic curves of the Northern Andes.** a) Elevation (m asl). b) Terrain ruggedness index  
 418 calculates the sum change in elevation between a grid cell and its eight neighbor grid cells (Riley et al. (1999) using  
 419 a ca. 30m DEM (NASA STRM Global 1arc second V003). c) Delimitation of mountain ranges. d) Elevational  
 420 availability of surface area for the Northern Andes and each mountain range separately shown for 100 m bins.  
 421 Hypsographic curves based on the Shuttle Radar Topography Mission 1-arc second Digital Terrain Elevation Data (~  
 422 30 m resolution; USGS), taking an elevational threshold of 500 m asl as the horizontal reference plane. Maximum  
 423 elevation per cordillera is indicated. VEN: Venezuela; COL: Colombia; ECU: Ecuador.

424

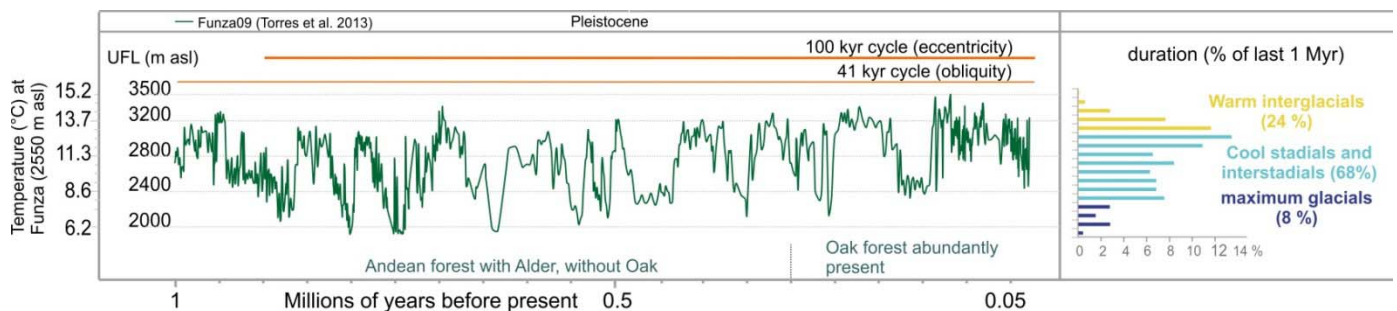

425

426 **Figure 3 | Upper forest line (UFL) curve of Funza09 (Torres et al. 2013) and reconstructed temperature record**  
 427 **covering the last 1 Myr (last ca. 30 kyr BP not included).**

428



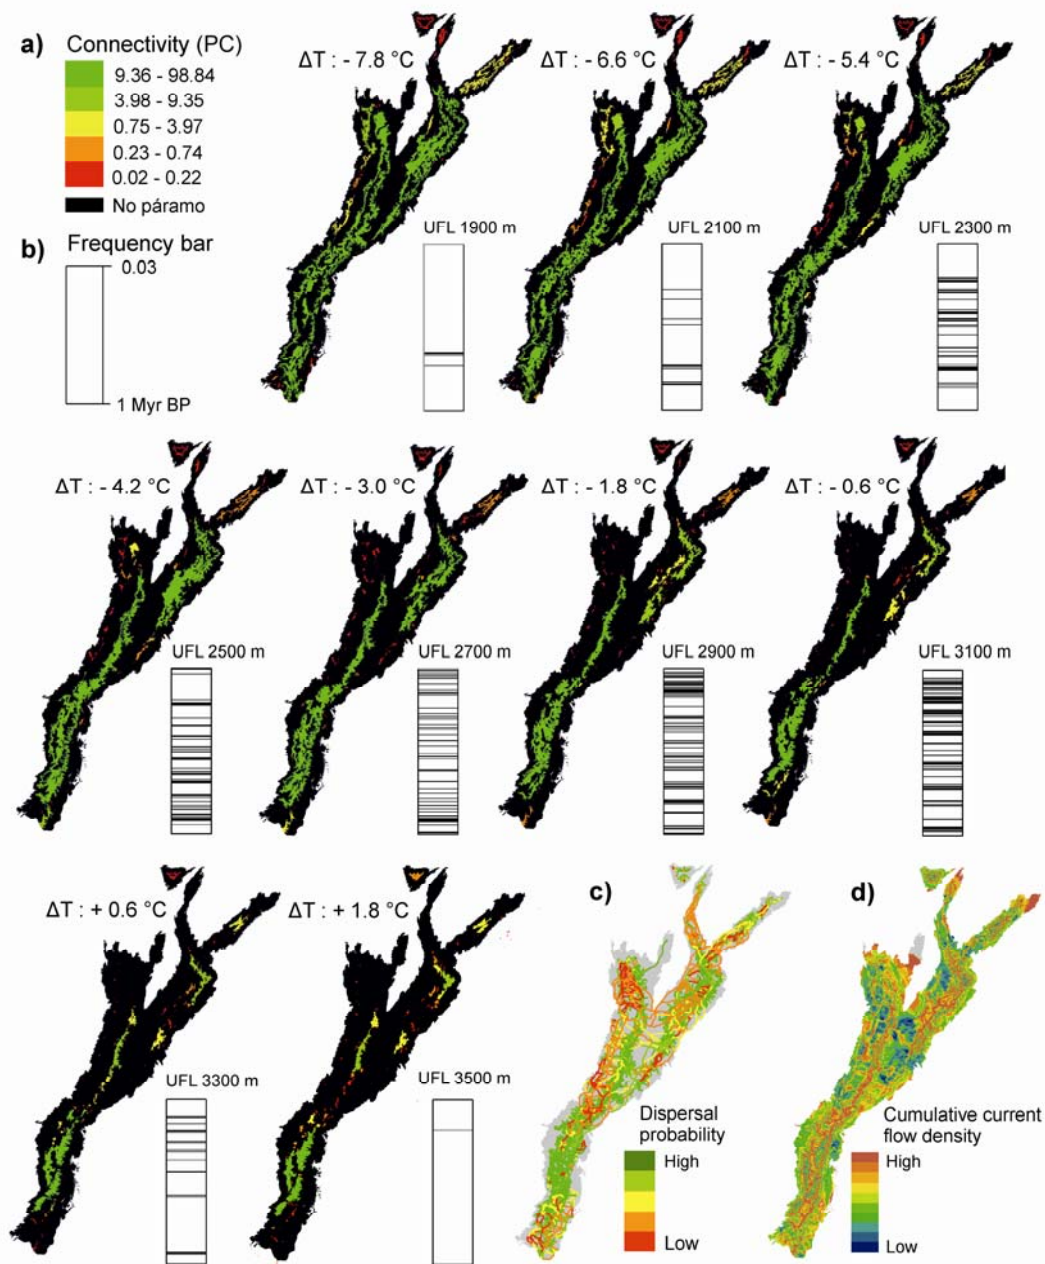

429

430 **Figure 4 | Páramo connectivity at different upper forest line (UFL) elevations.** a) Probability of connectivity  
 431 metric (PC; distance = 10 km,  $p = 0.5$ ) (Saura & Rubio, 2010) calculated for all páramos larger than 1 km<sup>2</sup>. Maps are  
 432 plotted with natural-breaks classification. Temperature at 2550 m elevation are relative to the present. b) Frequency  
 433 bar indicates when the corresponding UFL elevation occurred during the last 1 Myr. Dispersal pathway analysis  
 434 among páramos using c) Least cost pathways and d) Circuit model expressed in cumulative current flow density  
 435 (McRae et al., 2008). Areas with high dispersal probability (c) and high current flow (d) indicate frequent and highly  
 436 probable corridors during the last 1 Myr (weighted by frequency and duration). See Appendices 4 and 5 for all maps  
 437 and frequencies.

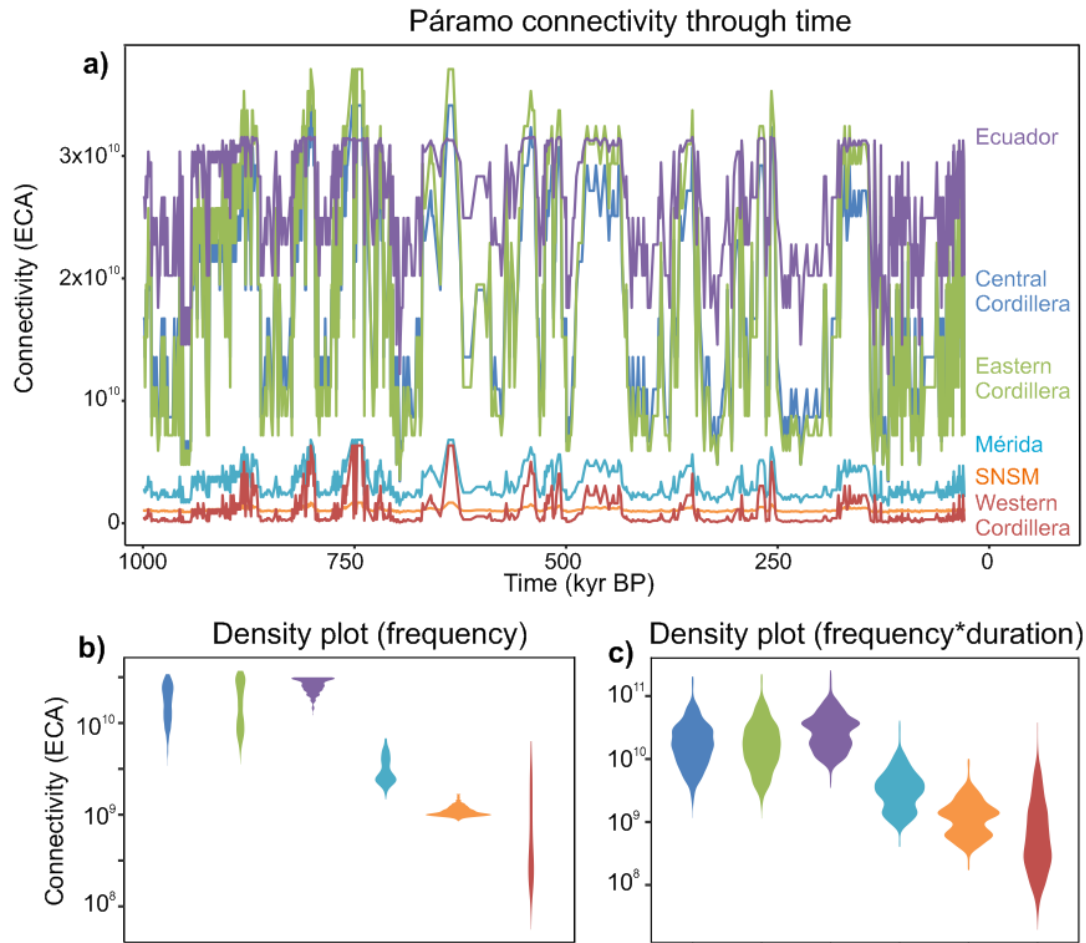

438  
439 **Figure 5 | The 'Flickering Connectivity System' of the Northern Andes.** a) Páramo connectivity (ECA) through  
440 time (3000-30 kyr BP) for each cordillera. b) Violin plot showing the distribution of the data and its probability  
441 density. Plot only considers how often certain connectivity occurred, not how long it lasted. c) Violin plot showing  
442 the distribution of the data and its probability density multiplied by how long connectivity persisted.

443  
444  
445

446 **REFERENCES**

- 447 Ali, J. R., & Aitchison, J. C. (2014). Exploring the combined role of eustasy and oceanic island thermal  
448 subsidence in shaping biodiversity on the Galápagos. *Journal of Biogeography*, *41*(7), 1227–1241.  
449 <https://doi.org/10.1111/jbi.12313>
- 450 Antonelli, A., Kissling, W. D., Flantua, S. G. A., Bermúdez, M. A., Mulch, A., Muellner-Riehl, A. N., ...  
451 Hoorn, C. (2018). Geological and climatic influences on mountain biodiversity. *Nature*  
452 *Geoscience*, *11*(10), 718–725. <https://doi.org/10.1038/s41561-018-0236-z>
- 453 Barthlott, W., Rafiqpoor, D., Kier, G., & Kreft, H. (2005). Global centers of vascular plant diversity. *Nova*  
454 *Acta Leopoldina NF*, *92*(342), 61–83.
- 455 Bertuzzo, E., Carrara, F., Mari, L., Altermatt, F., Rodriguez-Iturbe, I., & Rinaldo, A. (2016). Geomorphic  
456 controls on elevational gradients of species richness. *Proceedings of the National Academy of*  
457 *Sciences*, *113*(7), 1737–1742.
- 458 Bogotá-A., R. G., Hooghiemstra, H., & Berrio, J. C. (2016). North Andean environmental and climatic  
459 change at orbital to submillennial time-scales: Vegetation, water-levels and sedimentary regimes  
460 from Lake Fúquene between 284 and 130ka. *Review of Palaeobotany and Palynology*, *226*, 91–  
461 107. <https://doi.org/10.1016/j.revpalbo.2015.09.007>
- 462 Bogotá-Angel, R. G., Groot, M. H. M., Hooghiemstra, H., Lourens, L. J., Van der Linden, M., & Berrio, J.  
463 C. (2011). Rapid climate change from north Andean Lake Fúquene pollen records driven by  
464 obliquity: implications for a basin-wide biostratigraphic zonation for the last 284 ka. *Quaternary*  
465 *Science Reviews*, *30*(23–24), 3321–3337. <https://doi.org/10.1016/j.quascirev.2011.08.003>
- 466 Boom, A., Marchant, R., Hooghiemstra, H., & Sinninghe Damsté, J. S. (2002). CO<sub>2</sub>- and temperature-  
467 controlled altitudinal shifts of C<sub>4</sub>- and C<sub>3</sub>-dominated grasslands allow reconstruction of  
468 palaeoatmospheric pCO<sub>2</sub>. *Palaeogeography, Palaeoclimatology, Palaeoecology*, *177*, 151–168.

- 469 Boom, A., Mora, G., Cleef, A. M., & Hooghiemstra, H. (2001). High Altitude C4 grasslands in the  
470 northern Andes: Relicts from glacial conditions? *Review of Palaeobotany and Palynology*, 115,  
471 147–160.
- 472 Bouchenak-Khelladi, Y., Onstein, R. E., Xing, Y., Schwery, O., & Linder, H. P. (2015). On the  
473 complexity of triggering evolutionary radiations. *New Phytologist*, 207(2), 313–326.  
474 <https://doi.org/10.1111/nph.13331>
- 475 Cadena, C. D., Pedraza, C. A., & Brumfield, R. T. (2016). Climate, habitat associations and the potential  
476 distributions of Neotropical birds: Implications for diversification across the Andes. *Revista de La*  
477 *Academia Colombiana de Ciencias Exactas, Físicas y Naturales*, 40(155), 275–287.
- 478 Cleef, A.M. (1981). *The vegetation of the páramos of the Colombian Cordillera Oriental*. J Cramer,  
479 Vaduz. Retrieved from <http://repository.naturalis.nl/record/534752>
- 480 Cleef, Antoine M. (1979). The phyogeographical position in the Neotropical vascular páramo flora with  
481 special reference to the Colombian Cordillera Oriental. In K. Larsen & L. B. Holm-Nielsen (Eds.),  
482 *Tropical Botany* (pp. 175–184). London: Academic Press.
- 483 Contreras-Ortiz, N., Atchison, G. W., Hughes, C. E., & Madriñán, S. (2018). Convergent evolution of  
484 high elevation plant growth forms and geographically structured variation in Andean *Lupinus*  
485 (Fabaceae). *Botanical Journal of the Linnean Society*. <https://doi.org/10.1093/botlinnean/box095>
- 486 Dias, M. S., Oberdorff, T., Hugueny, B., Leprieur, F., Jézéquel, C., Cornu, J.-F., ... Tedesco, P. A. (2014).  
487 Global imprint of historical connectivity on freshwater fish biodiversity. *Ecology Letters*, 17(9),  
488 1130–1140. <https://doi.org/10.1111/ele.12319>
- 489 Diazgranados, M. (2012). *Phylogenetic and biogeographic relationships of Frailejones (Espeletiinae,*  
490 *Compositae): An ongoing radiation in the Tropical Andes* (Ph.D. Dissertation). Saint Louis  
491 University, St. Louis.
- 492 Diazgranados, M., & Barber, J. C. (2017). Geography shapes the phylogeny of frailejones (Espeletiinae  
493 Cuatrec., Asteraceae): a remarkable example of recent rapid radiation in sky islands. *PeerJ*, 5,  
494 e2968. <https://doi.org/10.7717/peerj.2968>

- 495 Elsen, P. R., & Tingley, M. W. (2015). Global mountain topography and the fate of montane species under  
496 climate change. *Nature Climate Change*, 5(8), 772–776. <https://doi.org/10.1038/nclimate2656>
- 497 Flantua, S. G. A., Hooghiemstra, H., Vuille, M., Behling, H., Carson, J. F., Gosling, W. D., ... González-  
498 Arango, C. (2016). Climate variability and human impact in South America during the last 2000  
499 years: synthesis and perspectives from pollen records. *Climate of the Past*, 12(2), 483–523.  
500 <https://doi.org/10.5194/cp-12-483-2016>
- 501 Flantua, S.G.A., & Hooghiemstra, H. (2018). Historical connectivity and mountain biodiversity. In C.  
502 Hoorn, A. Perrigo, & A. Antonelli (Eds.), *Mountains, climate and biodiversity* (1st ed., pp. 171–  
503 185). Wiley-Blackwell.
- 504 Flantua, Suzette G. A., Hooghiemstra, H., Grimm, E. C., Behling, H., Bush, M. B., González-Arango, C.,  
505 ... Van Boxel, J. H. (2015). Updated site compilation of the Latin American Pollen Database.  
506 *Review of Palaeobotany and Palynology*, 223, 104–115.  
507 <https://doi.org/10.1016/j.revpalbo.2015.09.008>
- 508 Flantua, Suzette G. A., Hooghiemstra, H., Van Boxel, J. H., Cabrera, M., González-Carranza, Z., &  
509 González-Arango, C. (2014). Connectivity dynamics since the Last Glacial Maximum in the  
510 northern Andes; a pollen-driven framework to assess potential migration. In W. D. Stevens, O. M.  
511 Montiel, & P. H. Raven (Eds.), *Paleobotany and Biogeography: A Festschrift for Alan Graham in*  
512 *His 80th Year* (1st ed., Vol. 2014, pp. 98–123). St. Louis: Missouri Botanical Garden.
- 513 Graham, C. H., Carnaval, A. C., Cadena, C. D., Zamudio, K. R., Roberts, T. E., Parra, J. L., ... Sanders,  
514 N. J. (2014). The origin and maintenance of montane diversity: integrating evolutionary and  
515 ecological processes. *Ecography*, 37(8), 711–719. <https://doi.org/10.1111/ecog.00578>
- 516 Graham, C. H., Moritz, C., & Williams, S. E. (2006). Habitat history improves prediction of biodiversity  
517 in rainforest fauna. *Proceedings of the National Academy of Sciences of the United States of*  
518 *America*, 103(3), 632–636. <https://doi.org/10.1073/pnas.0505754103>

- 519 Grant, P. R. (2014). Adaptive radiation. In J. B. Losos, D. A. Baum, D. J. Futuyma, H. E. Hoekstra, R. E.  
520 Lenski, A. J. Moore, ... M. C. Whitlock (Eds.), *The Princeton guide to Evolution*. Princeton  
521 University Press.
- 522 Groot, M. H. M., Bogotá, R. G., Lourens, L. J., Hooghiemstra, H., Vriend, M., Berrio, J. C., ...  
523 Westerhoff, W. (2011). Ultra-high resolution pollen record from the northern Andes reveals rapid  
524 shifts in montane climates within the last two glacial cycles. *Clim. Past*, 7(1), 299–316.  
525 <https://doi.org/10.5194/cp-7-299-2011>
- 526 Groot, Mirella H. M., Hooghiemstra, H., Berrio, J. C., & Giraldo, C. (2013). North Andean environmental  
527 and climatic change at orbital to submillennial time-scales: Vegetation, water levels and  
528 sedimentary regimes from Lake Fúquene 130–27ka. *Review of Palaeobotany and Palynology*,  
529 197(Supplement C), 186–204. <https://doi.org/10.1016/j.revpalbo.2013.04.005>
- 530 Hazzi, N. A., Moreno, J. S., Ortiz-Movliav, C., & Palacio, R. D. (2018). Biogeographic regions and events  
531 of isolation and diversification of the endemic biota of the tropical Andes. *Proceedings of the*  
532 *National Academy of Sciences*, 115(31), 7985–7990. <https://doi.org/10.1073/pnas.1803908115>
- 533 Herman, F., Seward, D., Valla, P. G., Carter, A., Kohn, B., Willett, S. D., & Ehlers, T. A. (2013).  
534 Worldwide acceleration of mountain erosion under a cooling climate. *Nature*, 504(7480), 423–  
535 426. <https://doi.org/10.1038/nature12877>
- 536 Hoeksema, B. W. (2007). Delineation of the Indo-Malayan centre of maximum marine biodiversity: The  
537 coral triangle. In W. Renema (Ed.), *Biogeography, Time, and Place: Distributions, Barriers, and*  
538 *Islands* (pp. 117–178). Dordrecht: Springer Netherlands. [https://doi.org/10.1007/978-1-4020-](https://doi.org/10.1007/978-1-4020-6374-9_5)  
539 [6374-9\\_5](https://doi.org/10.1007/978-1-4020-6374-9_5)
- 540 Hooghiemstra, H. (1984). *Vegetational and climatic history of the high plain of Bogotá, Colombia*.  
541 (Dissertationes Botanicae, Vol. 79).
- 542 Hooghiemstra, H., & Flantua, S. G. A. (2019). Colombia in the Quaternary: an overview of environmental  
543 and climatic change. In *The Geology of Colombia* (1st ed.). Bogotá, Colombia: INGEOMINAS.

- 544 Hooghiemstra, Henry, Berrio, J. C., Groot, M. H. M., Bogotá-A, R. G., Olivera, M. M., & González-  
545 Carranza, Z. (2012). The dynamic history of the upper forest line ecotone in the Northern Andes.  
546 In R. W. Myster (Ed.), *Ecotones Between Forest and Grassland* (pp. 229–246). Springer New  
547 York. Retrieved from [http://link.springer.com/chapter/10.1007/978-1-4614-3797-0\\_10](http://link.springer.com/chapter/10.1007/978-1-4614-3797-0_10)
- 548 Hooghiemstra, Henry, & Van der Hammen, T. (2004). Quaternary Ice-Age Dynamics in the Colombian  
549 Andes: Developing an Understanding of Our Legacy. *Philosophical Transactions: Biological*  
550 *Sciences*, 359(1442), 173–181.
- 551 Hughes, C. E., & Atchison, G. W. (2015). The ubiquity of alpine plant radiations: from the Andes to the  
552 Hengduan Mountains. *New Phytologist*, 207(2), 275–282. <https://doi.org/10.1111/nph.13230>
- 553 Hughes, C., & Eastwood, R. (2006). Island radiation on a continental scale: Exceptional rates of plant  
554 diversification after uplift of the Andes. *Proceedings of the National Academy of Sciences*,  
555 103(27), 10334–10339. <https://doi.org/10.1073/pnas.0601928103>
- 556 Jabaily, R. S., & Sytsma, K. J. (2013). Historical biogeography and life-history evolution of Andean Puya  
557 (Bromeliaceae). *Botanical Journal of the Linnean Society*, 171(1), 201–224.  
558 <https://doi.org/10.1111/j.1095-8339.2012.01307.x>
- 559 Knowles, L. L. (2000). Tests of Pleistocene Speciation in Montane Grasshoppers (genus *Melanoplus*)  
560 from the Sky Islands of Western North America. *Evolution*, 54(4), 1337–1348.  
561 <https://doi.org/10.1111/j.0014-3820.2000.tb00566.x>
- 562 Knowles, L. L., & Massatti, R. (2017). Distributional shifts – not geographic isolation – as a probable  
563 driver of montane species divergence. *Ecography*, 40(12), 1475–1485.  
564 <https://doi.org/10.1111/ecog.02893>
- 565 Kolář, F., Dušková, E., & Sklenář, P. (2016). Niche shifts and range expansions along cordilleras drove  
566 diversification in a high-elevation endemic plant genus in the tropical Andes. *Molecular Ecology*,  
567 25(18), 4593–4610. <https://doi.org/10.1111/mec.13788>
- 568 Kreft, H., & Jetz, W. (2007). Global patterns and determinants of vascular plant diversity. *Proceedings of*  
569 *the National Academy of Sciences*, 104(14), 5925–5930. <https://doi.org/10.1073/pnas.0608361104>

- 570 Kropf, M., Kadereit, J. W., & Comes, H. P. (2003). Differential cycles of range contraction and expansion  
571 in European high mountain plants during the Late Quaternary: insights from *Pritzelago alpina* (L.)  
572 O. Kuntze (Brassicaceae). *Molecular Ecology*, 12(4), 931–949. [https://doi.org/10.1046/j.1365-](https://doi.org/10.1046/j.1365-294X.2003.01781.x)  
573 294X.2003.01781.x
- 574 Lagomarsino, L. P., Condamine, F. L., Antonelli, A., Mulch, A., & Davis, C. C. (2016). The abiotic and  
575 biotic drivers of rapid diversification in Andean bellflowers (Campanulaceae). *New Phytologist*,  
576 210(4), 1430–1442. <https://doi.org/10.1111/nph.13920>
- 577 Lindborg, R., & Eriksson, O. (2004). Historical landscape connectivity affects present plant species  
578 diversity. *Ecology*, 85(7), 1840–1845.
- 579 Loomis, S. E., Russell, J. M., Verschuren, D., Morrill, C., Cort, G. D., Damsté, J. S. S., ... Kelly, M. A.  
580 (2017). The tropical lapse rate steepened during the Last Glacial Maximum. *Science Advances*,  
581 3(1), e1600815. <https://doi.org/10.1126/sciadv.1600815>
- 582 Madriñán, S., Cortés, A. J., & Richardson, J. E. (2013). Páramo is the world's fastest evolving and coolest  
583 biodiversity hotspot. *Frontiers in Genetics*, 4. <https://doi.org/10.3389/fgene.2013.00192>
- 584 Massatti, R., & Knowles, L. L. (2014). Microhabitat Differences Impact Phylogeographic Concordance of  
585 Codistributed Species: Genomic Evidence in Montane Sedges (*Carex* L.) from the Rocky  
586 Mountains. *Evolution*, 68(10), 2833–2846. <https://doi.org/10.1111/evo.12491>
- 587 McCormack, J. E., Huang, H., & Knowles, L. L. (2009). Sky islands. In R. G. Gillespie & D. Clague  
588 (Eds.), *Encyclopedia of Islands* (pp. 839–843). Berkeley: University of Chicago Press. Retrieved  
589 from  
590 [http://sites.oxy.edu/mccormack/McCormack/picks/McCormack\\_2009\\_sky\\_islands\\_REVIEW.pdf](http://sites.oxy.edu/mccormack/McCormack/picks/McCormack_2009_sky_islands_REVIEW.pdf)
- 591 McRae, B. H., & Kavanagh, D. M. (2011). *Linkage Mapper Connectivity Analysis Software*. Seattle WA:  
592 The Nature Conservancy. Retrieved from <http://www.circuitscape.org/linkagemapper>
- 593 McRae, B. H., Shirk, A. J., & Platt, J. T. (2013). *Gnarly Landscape Utilities: Resistance and Habitat*  
594 *Calculator User Guide*. Fort Collins, CO: The Nature Conservancy. Retrieved from  
595 <http://www.circuitscape.org/gnarly-landscape-utilities>.



- 596 McRae, Brad H., Dickson, B. G., Keitt, T. H., & Shah, V. B. (2008). Using circuit theory to model  
597 connectivity in ecology, evolution, and conservation. *Ecology*, 89(10), 2712–2724.  
598 <https://doi.org/10.1890/07-1861.1>
- 599 Moore, B. R., & Donoghue, M. J. (2007). Correlates of Diversification in the Plant Clade Dipsacales:  
600 Geographic Movement and Evolutionary Innovations. *The American Naturalist*, 170(S2), S28–  
601 S55. <https://doi.org/10.1086/519460>
- 602 Münzbergová, Z., Cousins, S. A. O., Herben, T., Plačková, I., Mildén, M., & Ehrlén, J. (2013). Historical  
603 habitat connectivity affects current genetic structure in a grassland species. *Plant Biology*, 15(1),  
604 195–202. <https://doi.org/10.1111/j.1438-8677.2012.00601.x>
- 605 Mutke, J., Jacobs, R., Meyers, K., Henning, T., & Weigend, M. (2014). Diversity patterns of selected  
606 Andean plant groups correspond to topography and habitat dynamics, not orogeny. *Frontiers in*  
607 *Genetics*, 5. <https://doi.org/10.3389/fgene.2014.00351>
- 608 Nevado, B., Contreras-Ortiz, N., Hughes, C., & Filatov, D. A. (2018). Pleistocene glacial cycles drive  
609 isolation, gene flow and speciation in the high elevation Andes. *New Phytologist*, 219(2), 779–  
610 793.
- 611 Norder, S. J., Proios, K., Whittaker, R. J., Alonso, M. R., Borges, P. A. V., Borregaard, M. K., ... Rijdsdijk,  
612 K. F. (2018). Beyond the Last Glacial Maximum: Island endemism is best explained by long-  
613 lasting archipelago configurations. *Global Ecology and Biogeography*, 0(0).  
614 <https://doi.org/10.1111/geb.12835>
- 615 Nürk, N. M., Scheriau, C., & Madriñán, S. (2013). Explosive radiation in high Andean Hypericum—rates  
616 of diversification among New World lineages. *Evolutionary and Population Genetics*, 4, 175.  
617 <https://doi.org/10.3389/fgene.2013.00175>
- 618 Onstein, R. E., Baker, W. J., Couvreur, T. L. P., Faurby, S., Svenning, J.-C., & Kissling, W. D. (2017).  
619 Frugivory-related traits promote speciation of tropical palms. *Nature Ecology & Evolution*, 1(12),  
620 1903. <https://doi.org/10.1038/s41559-017-0348-7>

- 621 Papadopoulou, A., & Knowles, L. L. (2015). Species-specific responses to island connectivity cycles:  
622 refined models for testing phylogeographic concordance across a Mediterranean Pleistocene  
623 Aggregate Island Complex. *Molecular Ecology*, 24(16), 4252–4268.  
624 <https://doi.org/10.1111/mec.13305>
- 625 Papadopoulou, A., & Knowles, L. L. (2016). Toward a paradigm shift in comparative phylogeography  
626 driven by trait-based hypotheses. *Proceedings of the National Academy of Sciences*, 113(29),  
627 8018–8024. <https://doi.org/10.1073/pnas.1601069113>
- 628 Pennington, R. T., Lavin, M., Särkinen, T., Lewis, G. P., Klitgaard, B. B., & Hughes, C. E. (2010).  
629 Contrasting plant diversification histories within the Andean biodiversity hotspot. *Proceedings of*  
630 *the National Academy of Sciences*, 107(31), 13783–13787.  
631 <https://doi.org/10.1073/pnas.1001317107>
- 632 Petit, R. J., Aguinagalde, I., Beaulieu, J.-L. de, Bittkau, C., Brewer, S., Cheddadi, R., ... Vendramin, G. G.  
633 (2003). Glacial Refugia: Hotspots but not melting pots of genetic diversity. *Science*, 300(5625),  
634 1563–1565. <https://doi.org/10.1126/science.1083264>
- 635 Pouchon, C., Fernández, A., Nassar, J. M., Boyer, F., Aubert, S., Lavergne, S., ... Antonelli, A. (2018).  
636 Phylogenomic Analysis of the Explosive Adaptive Radiation of the Espeletia Complex  
637 (Asteraceae) in the Tropical Andes. *Systematic Biology*, 67(6), 1041–1060.  
638 <https://doi.org/10.1093/sysbio/syy022>
- 639 Qian, H., & Ricklefs, R. E. (2000). Large-scale processes and the Asian bias in species diversity of  
640 temperate plants. *Nature*, 407(6801), 180–182. <https://doi.org/10.1038/35025052>
- 641 Quintero, I., & Jetz, W. (2018). Global elevational diversity and diversification of birds. *Nature*,  
642 555(7695), 246–250. <https://doi.org/10.1038/nature25794>
- 643 Ramírez-Barahona, S., & Eguiarte, L. E. (2013). The role of glacial cycles in promoting genetic diversity  
644 in the Neotropics: the case of cloud forests during the Last Glacial Maximum. *Ecology and*  
645 *Evolution*, 3(3), 725–738. <https://doi.org/10.1002/ece3.483>

- 646 Rull, V. (2005). Biotic diversification in the Guayana Highlands: a proposal. *Journal of Biogeography*,  
647 32(6), 921–927. <https://doi.org/10.1111/j.1365-2699.2005.01252.x>
- 648 Rull, Valentí. (2011). Neotropical biodiversity: timing and potential drivers. *Trends in Ecology &*  
649 *Evolution*, 26(10), 508–513. <https://doi.org/10.1016/j.tree.2011.05.011>
- 650 Rull, Valentí, & Nogué, S. (2007). Potential migration routes and barriers for vascular plants of the  
651 Neotropical Guyana highlands during the Quaternary. *Journal of Biogeography*, 34(8), 1327–  
652 1341.
- 653 Saura, S., Estreguil, C., Mouton, C., & Rodríguez-Freire, M. (2011). Network analysis to assess landscape  
654 connectivity trends: Application to European forests (1990–2000). *Ecological Indicators*, 11(2),  
655 407–416. <https://doi.org/10.1016/j.ecolind.2010.06.011>
- 656 Saura, S., & Pascual-Hortal, L. (2007). A new habitat availability index to integrate connectivity in  
657 landscape conservation planning: Comparison with existing indices and application to a case  
658 study. *Landscape and Urban Planning*, 83(2–3), 91–103.  
659 <https://doi.org/10.1016/j.landurbplan.2007.03.005>
- 660 Saura, S., & Rubio, L. (2010). A common currency for the different ways in which patches and links can  
661 contribute to habitat availability and connectivity in the landscape. *Ecography*, 33, 523–537.  
662 <https://doi.org/10.1111/j.1600-0587.2009.05760.x>
- 663 Saura, S., & Torné, J. (2009). Conefor Sensinode 2.2: A software package for quantifying the importance  
664 of habitat patches for landscape connectivity. *Environmental Modelling & Software*, 24(1), 135–  
665 139. <https://doi.org/10.1016/j.envsoft.2008.05.005>
- 666 Schönswetter, P., Stehlik, I., Holderegger, R., & Tribsch, A. (2005). Molecular evidence for glacial  
667 refugia of mountain plants in the European Alps. *Molecular Ecology*, 14(11), 3547–3555.  
668 <https://doi.org/10.1111/j.1365-294X.2005.02683.x>
- 669 Simpson, B. B. (1974). Glacial migrations of plants: Island biogeographical evidence. *Science*, 185(4152),  
670 698–700. <https://doi.org/10.1126/science.185.4152.698>

- 671 Sklenář, P., Hedberg, I., & Cleef, A. M. (2014). Island biogeography of tropical alpine floras. *Journal of*  
672 *Biogeography*, 41(2), 287–297. <https://doi.org/10.1111/jbi.12212>
- 673 Smith, B. T., McCormack, J. E., Cuervo, A. M., Hickerson, M. J., Aleixo, A., Cadena, C. D., ...  
674 Brumfield, R. T. (2014). The drivers of tropical speciation. *Nature*, 515(7527), 406–409.  
675 <https://doi.org/10.1038/nature13687>
- 676 Steinbauer, M. J., Field, R., Grytnes, J.-A., Trigas, P., Ah-Peng, C., Attorre, F., ... Beierkuhnlein, C.  
677 (2016). Topography-driven isolation, speciation and a global increase of endemism with  
678 elevation. *Global Ecology and Biogeography*, 25(9), 1097–1107.  
679 <https://doi.org/10.1111/geb.12469>
- 680 Tischendorf, L., & Fahrig, L. (2000). On the usage and measurement of landscape connectivity. *Oikos*,  
681 90(1), 7–19. <https://doi.org/10.1034/j.1600-0706.2000.900102.x>
- 682 Torres, V., Hooghiemstra, H., Lourens, L., & Tzedakis, P. C. (2013). Astronomical tuning of long pollen  
683 records reveals the dynamic history of montane biomes and lake levels in the tropical high Andes  
684 during the Quaternary. *Quaternary Science Reviews*, 63, 59–72.  
685 <https://doi.org/10.1016/j.quascirev.2012.11.004>
- 686 Uribe-Convers, S., & Tank, D. C. (2015). Shifts in diversification rates linked to biogeographic movement  
687 into new areas: An example of a recent radiation in the Andes. *American Journal of Botany*,  
688 102(11), 1854–1869. <https://doi.org/10.3732/ajb.1500229>
- 689 Van der Hammen, T. (1974). The Pleistocene changes of vegetation and climate in tropical South  
690 America. *Journal of Biogeography*, 1, 3–26. <https://doi.org/10.2307/3038066>
- 691 Van der Hammen, Thomas. (1981). Glaciales y glaciaciones en el cuaternario de Colombia: paleoecología  
692 y estratigrafía. *Revista CIAF*, 6(1–3), 635–638.
- 693 Von Humboldt, A. (1845). *Kosmos: Entwurf einer physischen Weltbeschreibung* (Vol. 1). Eichborn  
694 Verlag.

- 695 Wallis, G. P., Waters, J. M., Upton, P., & Craw, D. (2016). Transverse Alpine Speciation Driven by  
696 Glaciation. *Trends in Ecology & Evolution*, 31(12), 916–926.  
697 <https://doi.org/10.1016/j.tree.2016.08.009>
- 698 Weigelt, P., Steinbauer, M. J., Cabral, J. S., & Kreft, H. (2016). Late Quaternary climate change shapes  
699 island biodiversity. *Nature*, 532(7597), 99–102. <https://doi.org/10.1038/nature17443>
- 700 Weir, J. T. (2006). Divergent timing and patterns of species accumulation in lowland and highland  
701 neotropical birds. *Evolution*, 60(4), 842–855. <https://doi.org/10.1554/05-272.1>
- 702 Weir, J. T., Haddrath, O., Robertson, H. A., Colbourne, R. M., & Baker, A. J. (2016). Explosive ice age  
703 diversification of kiwi. *Proceedings of the National Academy of Sciences*, 201603795.  
704 <https://doi.org/10.1073/pnas.1603795113>
- 705 Wille, M., Hooghiemstra, H., Behling, H., van der Borg, K., & Negret, A. J. (2001). Environmental  
706 change in the Colombian subandean forest belt from 8 pollen records: the last 50 kyr. *Vegetation  
707 History and Archaeobotany*, 10(2), 61–77.
- 708 Winkworth, R. C., Wagstaff, S. J., Glenny, D., & Lockhart, P. J. (2005). Evolution of the New Zealand  
709 mountain flora: Origins, diversification and dispersal. *Organisms Diversity & Evolution*, 5(3),  
710 237–247. <https://doi.org/10.1016/j.ode.2004.12.001>

711

712

### 713 BIOSKETCHES

714 **Suzette Flantua** has a background in paleoecology, biogeography, landscape ecology and spatial  
715 analyses, and enjoys integrating them all. She is interested in a wide range of topics from the Miocene to  
716 the present, from islands to mountains, to understand contemporary patterns of species richness and  
717 endemism.

718 **Henry Hooghiemstra** is a terrestrial and marine tropical palynologist working on time-scales from the  
719 full Quaternary to the Anthropocene. His research focuses on a wide variety of biomes in Central and  
720 South America, Saharan and East Africa and in Mauritius.

721 **Aaron O’Dea** is a marine paleobiologist and uses the marine fossil record in Tropical America to explore  
722 drivers of macroevolution in the seas, and takes cores on coral reefs from French Polynesia to the  
723 Dominican Republic to reconstruct how reefs changed over millennia with the aim of improving their  
724 future resilience.

725 **Renske E. Onstein** is an evolutionary ecologist who enjoys collecting (and eating) tropical megafaunal  
726 fruits, e.g. on Borneo and Madagascar, while studying how fruit functional traits interact with frugivores  
727 to affect diversification dynamics. She is generally interested in the broad-scale distribution and  
728 diversification of functional and taxonomic diversity of flowering plants.

729

## 730 **APPENDICES**

731 Additional Supporting Information may be found in the online version of this article:

732 **Appendix 1** | Surface areas, elevational ranges and hypsographies of the Northern Andes

733 **Appendix 2** | Background on the páramo alpine biome

734 **Appendix 3** | Methodology underlying the use of fossil pollen data to reconstruct the upper forest line  
735 changes

736 **Appendix 4** | Degree of connectivity of páramos at all UFL elevations during the last 1 Myr.

737 **Appendix 5** | Frequency analysis of all UFL elevations during the last 1 Myr.

738 **Appendix 6** | **Visualization of the flickering connectivity system in the Northern Andes.** Artwork by  
739 Catalina Giraldo Pastrana in collaboration with Suzette G.A. Flantua and Henry Hooghiemstra.

740 **Appendix 7** | Further suggestions for future work.

741

## 742 **AUTHOR CONTRIBUTIONS**

743 S.G.A.F. and H.H. conceived the ideas. H.H. provided the AP% of the Funza09 dataset. S.G.A.F.  
744 performed the spatial analyses. S.G.A.F and H.H. led the writing and figure design with critical  
745 contributions by A.O. and R.E.O. All authors contributed to versions of the manuscript and revisions.

746
